# Supplementary material
Source: MDPI journal article supplement (https://www.mdpi.com/2075-163X/10/3/225)
Supplement: s1 [file s1]

## Sheet: S1-Whole rock
Table S1. Major element oxides (wt%) and trace element (ppm) compositions of the Hujialin garnet- clinopyroxenites.
Sample	RZ-1	RZ-2	RZ-5	RZ-6	RZ-8	RZ-11	RZ-14
SiO2	42.4053	48.1583	50.928	50.1787	51.6576	53.876	50.8834
TiO2	1.757	1.389	1.418	1.508	1.546	0.7337	1.236
Al2O3	12.214	10.751	6.1184	6.1304	5.5899	5.8195	6.0787
FeO	1.56	0.55	0.74	0.78	0.64	0.55	0.74
Fe2O3	16.68	8.642	9.892	9.572	9.097	7.562	10.49
MnO	0.1145	0.0883	0.1031	0.1058	0.0882	0.0778	0.0877
MgO	9.323	9.814	10.71	10.76	11	12.98	11.61
CaO	16.78	20.05	19.71	20.69	19.76	17.75	18.46
Na2O	0.2624	0.5415	0.5201	0.4998	0.6418	0.5434	0.5387
K2O	0.0213	0.0492	0.072	0.034	0.072	0.0826	0.0859
P2O5	0.0026	0.0023	0.0022	0.0022	0.0032	0.0181	0.0037
L.O.I	0.27	0.21	0.87	0.37	0.3	2.28	0.89
Total	101.12	100.036	100.214	100.261	100.096	99.9931	100.214
Sc	48.938	51.062	76.217	75.094	76.809	82.146	79.427
V	269.577	226.388	202.483	199.585	186.724	160.361	223.983
Cr	183.127	525.974	491.115	460.324	579.552	417.091	357.21
Co	145.659	124.043	69.4457	65.2119	71.1132	67.1989	69.3086
Ni	190.576	181.098	181.329	158.282	183.014	291.546	255.226
Cu	28.2	29.238	27.828	25.182	36.57	39.612	24.885
Zn	120.146	111.733	88.047	94.742	91.013	77.67	88.517
Ga	15.912	13.88	8.124	7.936	8.838	5.509	8.851
As	9.173	15.979	18.094	17.416	16.667	16.208	16.049
Rb	2.054	2.428	1.432	1.119	1.657	1.015	2.252
Sr	58.389	160.42	127.759	130.348	151.696	147.467	100.557
Y	8.369	8.959	9.993	10.352	6.904	5.641	6.65
Zr	26.8	29.8	37	38.7	42.8	28.7	30
Nb	0.683	0.562	1.211	1.309	4.029	0.697	1.333
Cs	0.139	0.155	0.1	0.1	0.1	0.1	0.1
Ba	28.103	49.183	26.68	33.683	21.376	39.536	32.296
La	2.442	1.531	2.735	3.304	2.958	5.082	2.361
Ce	6.673	5.441	8.494	10.223	10.352	10.524	6.61
Pr	1.505	1.238	2.037	2.21	2.183	1.895	1.374
Nd	8.922	8.153	11.908	13.119	12.117	9.319	7.997
Sm	2.637	2.552	3.232	3.752	3.168	2.3	2.37
Eu	0.817	0.828	1.209	1.227	1.036	0.737	0.748
Gd	2.392	2.233	2.832	3.183	2.465	1.786	1.947
Tb	0.394	0.396	0.474	0.522	0.386	0.272	0.337
Dy	2.041	2.116	2.573	2.726	1.876	1.394	1.704
Ho	0.358	0.381	0.412	0.446	0.286	0.24	0.289
Er	0.879	0.86	0.988	0.971	0.664	0.588	0.683
Tm	0.101	0.117	0.131	0.126	0.1	0.1	0.1
Yb	0.544	0.603	0.655	0.651	0.438	0.387	0.443
Lu	0.079	0.076	0.092	0.101	0.067	0.057	0.064
Hf	1.2	2.5	2	2.6	2.3	2.9	2.1
Ta	0.11	0.296	0.202	0.352	0.54	0.1	0.125
Tl	0.151	0.099	0.045	0.028	0.027	0.022	0.027
Pb	5.558	10.762	5.137	5.23	6.169	6.308	5.786
Th	1.376	0.292	0.18	0.123	0.103	0.241	0.093
U	0.1	0.1	0.1	0.1	0.1	0.1	0.1
Li	2.679	4.019	2.548	1.783	2.049	1.309	2.276
Be	0.2	0.2	0.2	0.2	0.2	0.2	0.2
Mo	0.096	0.231	0.1	0.142	0.1	0.1	0.1
Cd	0.069	0.078	0.069	0.059	0.06	0.055	0.062
In	0.062	0.074	0.067	0.077	0.057	0.043	0.047
Sb	0.17	0.176	0.193	0.14	0.106	0.1	0.1
Bi	0.011	0.025	0.017	0.012	0.011	0.028	0.016

## Sheet: S2-Grt
Table S2. EPM analyses of representative garnet compositions.
Sample	18RZ-1-7									HJL-6
Mineral	Grt	Grt	Grt	Grt	Grt	Grt	Grt	Grt	Grt	Grt	Grt	Grt	Grt	Grt	Grt
SiO2	38.869	39.399	39.651	40.415	40.134	39.477	40.904	39.978	40.658	40.417	39.993	40.009	40.436	40.567	40.332
TiO2	0.111	0.114	0.154	0.161	0.246	0.185	0.199	0.284	0.251	0.171	0.199	0.181	0.151	0.111	0.215
Al2O3	20.914	21.55	21.22	21.322	21.349	21.227	20.849	21.029	20.972	21.028	20.424	20.74	21.454	21.477	21.276
Cr2O3	0.07	0.035	0.012	0.643	0.697	0.638	0.658	0.676	0.635	0.074	0.17	0.01	0	0.019	0.05
FeO	9.54	9.87	10.202	10.509	10.766	10.036	10.525	10.041	10.518	9.339	9.848	8.704	9.566	9.323	9.377
MnO	0.175	0.182	0.18	0.332	0.253	0.267	0.235	0.147	0.233	0.181	0.176	0.195	0.177	0.158	0.158
MgO	7.246	8.82	8.554	8.043	8.15	7.719	7.111	7.681	7.966	9.056	6.927	8.1	9.621	9.374	9.267
CaO	21.513	18.851	18.939	18.062	18.122	18.59	19.819	18.721	18.145	19.211	21.851	20.398	18.396	18.925	19.009
Na2O	0.016	0.049	0.025	0.065	0.043	0.125	0.064	0.315	0.086	0.062	0.023	0.093	0.002	0.042	0.007
K2O	0	0.013	0.019	0.013	0.013	0.037	0.003	0.11	0.014	0	0	0.025	0.013	0	0.021
P2O5	0.043	0	0.043	0	0.043	0.039	0.043	0.059	0.04	0	0	0	0	0	0
Total	98.497	98.883	98.999	99.565	99.816	98.34	100.41	99.041	99.518	99.539	99.611	98.455	99.83	100.01	99.743
Oxygen = 12
Si	2.94278	2.95187	2.97605	3.03088	3.00928	3.00386	3.05545	3.02162	3.05078	3.00624	3.0037	3.01432	2.99365	2.99826	2.99291
Ti	0.00632232	0.00642564	0.00869574	0.00908347	0.0138766	0.0105903	0.0111831	0.0161487	0.014169	0.00956876	0.0112441	0.0102591	0.00841025	0.00617191	0.0120028
Cr	0.00419012	0.00207326	0.000712102	0.0381252	0.0413197	0.0383824	0.0388606	0.0403962	0.0376716	0.00435178	0.0100948	0.000595671	0	0.00111026	0.00293352
Al	1.86615	1.9029	1.8771	1.88456	1.88661	1.90362	1.83548	1.87324	1.85464	1.84338	1.80788	1.8416	1.87196	1.87079	1.86076
Fe3+	0.233813	0.186806	0.158157	0.0121315	0.049898	0.0766932	0.00292511	0.101425	0	0.129593	0.155486	0.12463	0.12544	0.125249	0.129485
Fe2+	0.370233	0.431633	0.482225	0.646974	0.625207	0.561959	0.65458	0.533268	0.660033	0.451342	0.463083	0.423796	0.466845	0.451012	0.452451
Mn	0.0112222	0.0115497	0.0114431	0.0210887	0.0160678	0.0172081	0.0148684	0.0094107	0.0148083	0.0114031	0.0111962	0.0124438	0.0110992	0.00989098	0.00993085
Mg	0.817825	0.985118	0.957113	0.899191	0.910993	0.875599	0.791859	0.865455	0.891073	1.00416	0.775579	0.909756	1.06184	1.03283	1.02516
Ca	1.74512	1.51327	1.52305	1.45132	1.45588	1.51561	1.58621	1.51607	1.45879	1.53102	1.75839	1.64661	1.45924	1.49866	1.51138
Na	0.00234866	0.00711795	0.00363809	0.00945119	0.00625122	0.0184414	0.00926907	0.0461611	0.0125115	0.00894126	0.00334925	0.0135851	0.000287084	0.00601856	0.00100714
K	0	0.00124255	0.00181928	0.00124374	0.00124352	0.00359168	0.000285884	0.0106065	0.00134015	0	0	0.00240287	0.00122782	0	0.00198803
P	0	0	0	0	0.00272955	0.00251231	0.00271926	0.00377523	0.00254096	0	0	0	0	0	0
Total	8.00419	8.00207	8.00071	8.00404	8.01936	8.02807	8.00369	8.03757	7.99836	8.00435	8.01009	8.0006	8	8.00111	8.00293
Alm	0.123411	0.143878	0.160742	0.215658	0.208402	0.18732	0.218193	0.177756	0.220011	0.150447	0.154361	0.141265	0.155615	0.150337	0.150817
Gross	0.462705	0.409984	0.428248	0.458644	0.439685	0.447664	0.507845	0.434445	0.467427	0.443367	0.503339	0.486256	0.423693	0.436374	0.437584
Pyp	0.272608	0.328373	0.319038	0.29973	0.303664	0.291866	0.263953	0.288485	0.297024	0.334721	0.258526	0.303252	0.353948	0.344277	0.341719
Spess	0.00374073	0.00384988	0.00381437	0.00702957	0.00535593	0.00573604	0.00495612	0.0031369	0.00493612	0.00380105	0.00373207	0.00414792	0.00369973	0.00329699	0.00331028

## Sheet: S3-Cpx
Table S3. EPM analyses of representative clinopyroxene compositions (inc-clinopyroxene inclusions in garnet).
Sample	18RZ-1-7			HJL6						HJL4
Mineral	Cpx-inc	Cpx-inc	Cpx-inc	Cpx-inc	Cpx-inc	Cpx-inc	Cpx-inc	Cpx-inc	Cpx-inc	Cpx	Cpx	Cpx
SiO2	53.762	54.051	54.128	52.078	53.273	52.716	53.734	53.149	53.271	53.954	54.115	53.7
TiO2	0.28	0.238	0.29	0.126	0.12	0.147	0.181	0.379	0.267	0	0	0.014
Al2O3	2.738	2.629	3.117	3.212	2.173	2.391	2.087	3.026	2.255	0.748	0.74	0.565
Cr2O3	0.148	0.221	0.194	0	0	0	0	0	0.03	0.178	0.191	0.18
FeO	2.586	2.818	2.951	2.278	1.985	2.095	2.239	2.41	2.307	2.219	2.219	2.089
MnO	0	0	0.004	0.053	0.002	0	0.021	0.028	0.005	0.057	0.064	0
MgO	15.781	15.777	15.72	16.57	16.331	16.541	16.398	16.013	16.252	17.174	17.165	17.325
CaO	23.528	23.401	23.452	23.128	24.254	23.575	24.5	24.198	24.2	24.617	24.713	24.762
Na2O	0.897	0.889	0.872	0.933	0.854	0.863	0.724	0.773	0.79	0.417	0.42	0.474
K2O	0.016	0.015	0.006	0.006	0.034	0.007	0	0	0	0	0	0.027
NiO	0	0	0	0.005	0.032	0.046	0.009	0.072	0.056	0.033	0.042	0
Total	99.763	100.043	100.742	98.389	99.058	98.381	99.893	100.048	99.433	99.397	99.669	99.136
Oxygen = 6
Si	1.956	1.962	1.952	1.914	1.947	1.938	1.948	1.927	1.941	1.968	1.969	1.964
Ti	0.008	0.006	0.008	0.003	0.003	0.004	0.005	0.01	0.007	0	0	0
Al	0.117	0.113	0.133	0.139	0.094	0.104	0.089	0.129	0.097	0.032	0.032	0.024
Cr	0.004	0.006	0.006	0	0	0	0	0	0.001	0.005	0.005	0.005
Fe3+	0.016	0.007	0.003	0.067	0.058	0.061	0.055	0.051	0.061	0.056	0.054	0.061
Fe2+	0.063	0.078	0.086	0.004	0.003	0.003	0.013	0.022	0.009	0.012	0.013	0.003
Mn	0	0	0	0.002	0	0	0.001	0.001	0	0.002	0.002	0
Mg	0.855	0.854	0.845	0.908	0.889	0.906	0.886	0.865	0.883	0.934	0.931	0.944
Ca	0.917	0.91	0.906	0.911	0.95	0.929	0.952	0.94	0.945	0.962	0.964	0.97
Na	0.063	0.063	0.061	0.066	0.061	0.062	0.051	0.054	0.056	0.029	0.03	0.034
K	0.001	0.001	0	0	0.002	0	0	0	0	0	0	0.001
Total	4	4	4	4.013	4.005	4.007	4	4	4	4	4	4.008

## Sheet: S4-Ilm+Mag
Table S4. EPM analyses of representative ilmenite and magnetite.
Sample	RZ-1
Mineral	Ilm							Mag
SiO2	0.069	0.017	0.113	0.031	0.055	0.062		0.083	0.088	0.037
TiO2	51.453	52.242	50.959	52.037	51.916	51.988		0.071	0.071	0.049
Al2O3	0.012	0.031	0.057	0	0.012	0		0.25	0.23	0.374
Cr2O3	0.002	0.02	0.08	0.193	0.161	0.13		0.148	0.153	0.048
FeO	44.914	44.157	45.137	45.013	44.878	44.678		91.291	91.246	90.785
MnO	0.849	0.976	0.962	2.242	2.179	2.115		0.012	0.004	0
MgO	2.398	2.311	2.175	0.262	0.265	0.36		0.12	0.084	0.146
CaO	0	0	0	0	0	0.015		0.09	0.043	0
Na2O	0	0	0.033	0.043	0.04	0		0.063	0.016	0.024
K2O	0.002	0	0.018	0.012	0	0		0	0.022	0
NiO	0	0	0.047	0	0.042	0.042		0.14	0.052	0.083
Total	99.699	99.754	99.581	99.833	99.39	99.39		92.286	92.009	91.546

## Sheet: S5-Amp+Sp
Table S5. EPM analyses of representative amphibole and spinel (exs-exsolution of pargasite in clinopyroxene).
Sample	HJL-6				RZ-1			Sample	RZ-1
Mineral	Prg-exs	Prg-exs	Prg	Prg	Amp	Amp	Amp	Mineral	Sp	Sp	Sp
SiO2	42.12	42.615	42.722	42.762	45.82	46.68	46.23	SiO2	0.034	0.037	0.03
TiO2	0.185	0.27	0.202	0.235	0.48	0.52	0.46	TiO2	0.31	0.028	0.049
Al2O3	15.106	14.992	14.779	15.045	9.91	9.47	8.69	Al2O3	62.404	61.944	61.704
Cr2O3	0.019	0	0	0.01	0.24	0.21	0.38	Cr2O3	0.082	0.056	0.064
FeO	4.643	4.86	5.336	6.65	10.6	10.68	12.39	FeO*	20.155	21.194	21.369
MnO	0.034	0.014	0.085	0.039	0.12	0.15	0.13	MnO	0.145	0.093	0.153
MgO	17.878	17.892	17.086	16.295	15.61	14.72	15.31	MgO	15.163	14.53	14.67
CaO	12.692	12.711	12.864	13.063	12.87	12.06	12.56	CaO	0.033	0.01	0.021
Na2O	3.28	3.049	2.548	1.931	1.02	1.23	1.17	Na2O	0.049	0.038	0.029
K2O	0.411	0.343	0.31	0.32	0.63	0.59	0.66	K2O	0	0.004	0.018
NiO	0.058	0.105	0.109	0.054	0	0	0	P2O5	0	0.004	0.004
Total	96.426	96.851	96.041	96.404	96.82	96.31	97.98	Total	98.375	97.938	98.111
Oxygens	23								4
Si	6.051	6.084	6.154	6.124	6.629	6.797	6.681	Si	0.000902941	0.000991923	0.000804151
Ti	0.02	0.029	0.022	0.025	0.052	0.057	0.05	Ti	0.00619358	0.000564721	0.000988125
Al	2.558	2.523	2.51	2.54	1.69	1.626	1.481	Al	1.95321	1.95718	1.94933
Cr	0.002	0	0	0.001	0.027	0.024	0.043	Cr	0.00172175	0.00118697	0.00135635
Fe3+	0.358	0.403	0.385	0.615	0.524	0.501	0.699	Fe3+	0.0445327	0.0541725	0.0638036
Fe2+	0.2	0.178	0.257	0.181	0.7	0.744	0.72	Fe2+	0.403109	0.421006	0.415232
Mn	0.004	0.002	0.01	0.005	0.015	0.019	0.016	Mn	0.00326163	0.00211176	0.00347371
Mg	3.828	3.807	3.668	3.478	3.366	3.194	3.297	Mg	0.600307	0.580698	0.586212
Ca	1.954	1.945	1.986	2.005	1.994	1.882	1.945	Ca	0.000938999	0.000287241	0.000603123
Na	0.914	0.844	0.712	0.536	0.287	0.347	0.328	Na	0.00252304	0.00197518	0.00150717
K	0.075	0.062	0.057	0.058	0.116	0.11	0.122	K	0	0.000136803	0.000615528
Total	16.089	16.017	15.894	15.781	16	16	16	Total	3.01842	3.02159	3.02537

## Sheet: S6-Chl+Chu
Table S6. Representative compositions of chlorite and clinohumite and olivin.
Sample	RZ-1						Sample	HJL-4
Mineral	Chl	Chl	Chl	Chl	Chu	Chu	Mineral	Ol	Ol	Ol
SiO2	29.3879	29.831	29.134	29.866	37.889	38.104	SiO2	39.401	38.921	39.732
TiO2	0	0	0.045	0.038	0	0.006	TiO2	0	0.026	0.098
Al2O3	20.486	20.023	19.297	18.401	0.017	0.023	Al2O3	0.057	0.023	0.034
Cr2O3	0.019	0.141	0.353	0.493	0	0.02	Cr2O3	0.038	0.051	0
MgO	31.31	30.477	26.54	28.009	39.56	39.64	MgO	42.093	41.915	44.601
MnO	0.027	0.012	0.152	0.11	0.567	0.717	MnO	0.499	0.557	0.148
FeO	4.685	4.989	10.616	10.118	19.898	20.098	FeO	17.072	17.78	14.12
CaO	0.015	0.01	0.145	0.073	0.016	0.022	CaO	0.093	0.086	0.068
Na2O	0	0.039	0.001	0.031	0.054	0.022	Na2O	0	0.09	0.045
K2O	0	0.058	0.006	0.013	0.02	0	K2O	0.006	0.044	0.015
P2O5	0.091	0.061	0.104	0.146	0.24	0.181	NiO	0.291	0.275	0.276
Total	86.485	85.641	86.393	87.298	98.261	98.833	Total	99.259	99.493	99.137
Oxygens	14	14	14	14	17	17	Oxygens	4	4	4
Si	2.821	2.882	2.88	2.916	4.86313	4.85938	Si	1.007	0.997	1.005
Ti	0	0	0.003	0.003	0.00257163	0.00345696	Ti	0	0.001	0.002
Al	2.318	2.28	2.249	2.118	0	0.000575561	Al	0.002	0.001	0.001
Cr	0.001	0.011	0.028	0.038	0	0.00201658	Cr	0.001	0.001	0
Fe3+	0.038	0	0	0.015	0	0	Fe3+	0	0.01	0
Fe2+	0.338	0.403	0.878	0.812	4.24637	4.22768	Fe2+	0.365	0.371	0.299
Mn	0.002	0.001	0.013	0.009	0.0616416	0.0774493	Mn	0.011	0.012	0.003
Mg	4.479	4.388	3.911	4.075	3.80737	3.82099	Mg	1.604	1.6	1.681
Ca	0.002	0.001	0.015	0.008	0.00220031	0.00300603	Ca	0.003	0.002	0.002
Na	0	0.007	0	0.006	0.0134383	0.00543976	Na	0	0.004	0.002
K	0	0.007	0.001	0.002	0.00327485	0	K	0	0.001	0
Total	10	9.98	9.978	10	13	13	Total	3	3	3

## Sheet: S7-U-Pb Dating
Table S7. U–Pb isotopic dating results for zircons from the Hujialin garnet-clinopyroxenite.
Spots	Element(ppm)			Ratio						Age (Ma)
	Th	U	Th/U	207Pb/206Pb	1σ	207Pb/235U	1σ	206Pb/238U	1σ	207Pb/206Pb	1σ	207Pb/235U	1σ	206Pb/238U	1σ
Z2778-01	13.5814	215.937	0.0628951	0.0558042	0.0040298	0.258216	0.019321	0.0336623	0.000702138	455.6	161.09	233.228	15.5929	213.429	4.38039
Z2778-03	2.69324	168.886	0.0159471	0.0540598	0.00597867	0.24687	0.0257504	0.0350793	0.00129417	372.275	251.817	224.03	20.9703	222.26	8.06089
Z2778-05	25.9839	336.943	0.0771167	0.0499673	0.00392767	0.218448	0.0169397	0.0321659	0.000699178	194.525	170.345	200.617	14.1172	204.09	4.36812
Z2778-06	52.6782	301.44	0.174755	0.0569872	0.00359481	0.269452	0.01794	0.0349401	0.000826784	500.04	143.5	242.256	14.3505	221.393	5.15124
Z2778-08	12.8077	89.115	0.143721	0.0567756	0.0066084	0.253387	0.0273547	0.0334673	0.0011081	483.375	254.597	229.324	22.1609	212.212	6.91292
Z2778-11	435.811	302.648	1.43999	0.057031	0.00523671	0.206297	0.0166583	0.0274295	0.000683284	500.04	203.678	190.441	14.0224	174.441	4.28817
Z2778-13	5.88294	71.7867	0.0819503	0.0658507	0.0189406	0.229282	0.0390344	0.0349384	0.00216213	1200	627.575	209.606	32.2426	221.382	13.468
Z2778-15	2.33213	93.9607	0.0248202	0.0577466	0.00763923	0.269081	0.0320862	0.0361992	0.00106711	520.41	294.405	241.958	25.6725	229.23	6.63989
Z2778-20	409.053	711.647	0.574797	0.111515	0.00190593	4.9889	0.0886915	0.323538	0.00292014	1824.38	30.095	1817.44	15.0878	1806.98	14.2563
Z2778-21	23.2502	178.235	0.130447	0.0571216	0.0047394	0.264791	0.0227968	0.0344555	0.00077382	494.485	215.715	238.52	18.3022	218.374	4.82366
Z2778-22	14.2194	100.297	0.141772	0.0473125	0.00813344	0.20269	0.0268346	0.032543	0.00137835	64.91	366.62	187.4	22.6557	206.444	8.60609
Z2779-25	880.899	1001.72	0.879389	0.0501608	0.00233338	0.193436	0.00850968	0.0282605	0.000383875	211.185	102.763	179.557	7.24112	179.652	2.40856
Z2779-26	632.161	285.584	2.21357	0.0636799	0.00260131	1.07863	0.0426106	0.123905	0.00171479	731.49	87.0275	742.964	20.8208	752.999	9.84398
Z2779-27	284.309	2598.51	0.109412	0.111539	0.00231781	5.04656	0.103289	0.326754	0.00286345	1824.38	37.5	1827.17	17.3896	1822.63	13.9477
Z2779-28	442.198	7907.14	0.0559239	0.109772	0.00241334	4.8872	0.113702	0.321305	0.00384332	1795.37	39.82	1800.05	19.6487	1796.1	18.7759
Z2779-29	984.207	1010.04	0.974419	0.0516966	0.00170068	0.389484	0.0126722	0.0545652	0.00060742	272.285	75.9125	333.992	9.26312	342.489	3.71768
Z2779-30	436.016	699.236	0.623561	0.0534968	0.00182533	0.411875	0.014408	0.0557458	0.000645918	350.055	49.995	350.224	10.3646	349.701	3.94851
Z2779-31	632.572	771.952	0.819445	0.0542496	0.00181305	0.408227	0.0132768	0.0545608	0.000491072	388.94	74.0675	347.597	9.57599	342.462	3.00756

## Sheet: S8-P-T
Table S8. Garnet-clinopyroxene P-T estimation according to Krogh Ravna (2000) [56].
		18RZ-1-7					HJL-6					RZ-1
	P/T	Ⅰ	Ⅱ	Ⅲ	Ⅳ	Ⅴ	Ⅰ	Ⅱ	Ⅲ	Ⅳ	Ⅴ	Ⅰ	Ⅱ
StageⅢ	4.5	792	824	839	854	817	792	848	780	758	817	812	810
StageⅣ	1	713	741	724	685	694	701	723	729	681	703	730	739
StageⅤ	0.5	611	571	630	636	630	588	619	609	575	592	622	618
